# Supplementary material for: Synthesis of poly(styrene-b-4-(tert-butyldimethylsiloxy)styrene) block copolymers and characterization of their self-assembled patterns
Source: Royal Society of Chemistry journal article supplement (doi:10.1039/c7me00085e), 2017-01-01
Supplement: c7me00085e1.pdf [file c7me00085e1.pdf]

## Electronic Supplementary Information (ESI)

### Synthesis of poly(styrene-*b*-4-(*tert*-butyldimethylsiloxy)styrene) block copolymers and characterization of their self-assembled patterns

Yoon Hyung Hur,<sup>‡a</sup> Seungwon Song,<sup>‡a</sup> Jimmy Mays,<sup>b</sup> YongJoo Kim,<sup>\*c</sup> Beom-Goo Kang,<sup>\*b</sup>  
and Yeon Sik Jung<sup>\*a</sup>

<sup>a</sup> Department of Materials Science and Engineering, Korea Advanced Institute of Science and Technology (KAIST), 291 Daehak-ro, Yuseong-gu, Daejeon 302-701, Republic of Korea

<sup>b</sup> Department of Chemistry, University of Tennessee, Knoxville, Tennessee 37996, United States

<sup>c</sup> KI for NanoCentury, Korea Advanced Institute of Science and Technology (KAIST), 291 Daehak-ro, Yuseong-gu, Daejeon 302-701, Republic of Korea

<sup>‡</sup> These authors equally contributed to this work.

**Table S1.** Synthesis results of PS-*b*-P4BDSS by anionic polymerization

| block copolymer (homopolymer) |                     |                           |                           |                      |                   |             |                   |                         |
|-------------------------------|---------------------|---------------------------|---------------------------|----------------------|-------------------|-------------|-------------------|-------------------------|
| sample                        | s-BuLi <sup>a</sup> | monomer                   |                           | $M_n \times 10^{-3}$ |                   |             | domain            | morphology <sup>f</sup> |
|                               |                     |                           |                           |                      |                   | $M_w/M_n^d$ | size <sup>e</sup> |                         |
|                               |                     | 1 <sup>st</sup> ,<br>mmol | 2 <sup>nd</sup> ,<br>mmol | calcd <sup>b</sup>   | obsd <sup>c</sup> |             | nm                |                         |
| A-13                          | 0.090               | A, 5.99                   | B, 1.78                   | 11.7 (6.9)           | 12.5 (7.5)        | 1.01 (1.02) | -                 | DIS                     |
| A-54                          | 0.021               | A, 7.48                   | B, 1.53                   | 53.2 (36.5)          | 54.2 (37.1)       | 1.05 (1.06) | 38.3              | CYL                     |
| A-33                          | 0.032               | A, 7.04                   | B, 1.41                   | 32.3 (22.0)          | 33.2 (22.9)       | 1.03 (1.04) | 21.5              | CYL                     |
| A-25                          | 0.015               | A, 6.20                   | B, 1.27                   | 24.0 (17.1)          | 25.3 (16.3)       | 1.01 (1.05) | 16.4              | CYL                     |
| A-117                         | 0.020               | A, 12.0                   | B, 2.41                   | 93.8 (62.4)          | 116.6 (63.0)      | 1.06 (1.12) | 54.8              | LAM                     |
| A-30                          | 0.028               | A, 3.84                   | B, 1.95                   | 32.6 (14.3)          | 29.8 (15.9)       | 1.03 (1.01) | 20.3              | LAM                     |
| A-27                          | 0.041               | A, 7.95                   | B, 1.21                   | 25.4 (19.1)          | 26.8 (19.9)       | 1.01 (1.03) | 18.9              | CYL + HPL               |

<sup>a</sup> sec-Butyllithium used as initiator of anionic polymerization. <sup>b</sup>  $M_n(\text{calcd}) = (\text{molecular weight of monomer}) \times [\text{monomer}] / [\text{initiator}]$ . <sup>c</sup>  $M_n$  of the block copolymer was determined by using  $M_n$  of poly(A) and the molar ratio of each block estimated by <sup>1</sup>H NMR. <sup>d</sup>  $M_w/M_n$  was determined by using SEC calibration with PS standards in a THF solution containing 2% triethylamine as the eluent at 40 °C. <sup>e</sup> Domain size of BCPs was measured by bulk SAXS. <sup>f</sup> Morphology of BCPs was confirmed by bulk SAXS, where DIS: disorder, CYL: cylinder, LAM: lamellae, and HPL: Hexagonally perforated lamellae.

**Table S2.** Synthesis results of PS-*b*-P4BDSS by RAFT polymerization

| sample | RAFT <sup>a</sup> | AIBN  | block copolymer<br>(homopolymer) |                      |                   |                   | domain<br>size <sup>e</sup> | morphology <sup>f</sup> |
|--------|-------------------|-------|----------------------------------|----------------------|-------------------|-------------------|-----------------------------|-------------------------|
|        |                   |       | monomer                          | $M_n \times 10^{-3}$ |                   |                   |                             |                         |
|        |                   |       |                                  | $M_w/M_n^d$          |                   |                   |                             |                         |
|        |                   |       |                                  | 1 <sup>st</sup> ,    | 2 <sup>nd</sup> , | obsd <sup>c</sup> |                             |                         |
|        |                   |       |                                  | mmol                 | mmol              |                   |                             |                         |
| Mmol   | Mmol              |       |                                  |                      | nm                |                   |                             |                         |
| R-55   | 0.021             | 0.011 | A, 3.62                          | B, 2.30              | 55.1 (36.3)       | 1.14 (1.21)       | -39.2                       | CYL                     |
| R-54   | 0.021             | 0.011 | A, 3.62                          | B, 2.33              | 54.3 (36.3)       | 1.32 (1.21)       | 39.2                        | CYL                     |
| R-25   | 0.020             | 0.010 | A, 1.64                          | B, 1.13              | 25.2 (16.2)       | 1.15 (1.17)       | 16.5                        | CYL                     |
| R-26   | 0.020             | 0.010 | A, 1.64                          | B, 1.15              | 25.7 (16.2)       | 1.21 (1.17)       | 16.8                        | CYL                     |

<sup>a</sup> sec-Butyllithium used as initiator of anionic polymerization. <sup>b</sup>  $M_n$  of the block copolymer was determined by using  $M_n$  of poly(A) and the molar ratio of each block estimated by <sup>1</sup>H NMR. <sup>c</sup>  $M_w/M_n$  was determined by using SEC calibration with PS standards in a THF solution containing 2% triethylamine as the eluent at 40 °C. <sup>d</sup> Domain size of BCPs was measured by bulk SAXS. <sup>e</sup> Morphology of BCPs was confirmed by bulk SAXS, where DIS: disorder, CYL: cylinder, LAM: lamellae, and HPL: Hexagonally perforated lamellae.

**Table S3.** Pattern quality comparison between various BCPs with different  $\chi$ .

|                                   | CD (nm)           | $\chi$ | PDI  | LER (nm)  | LWR (nm)  | Annealing Methods      |
|-----------------------------------|-------------------|--------|------|-----------|-----------|------------------------|
| PS- <i>b</i> -PMMA <sup>a</sup>   | 10.5 <sup>d</sup> | 0.0324 | 1.06 | 4.85±0.71 | -         | Thermal Annealing      |
| PS- <i>b</i> -P4BDSS              | 11.4              | 0.0525 | 1.01 | 3.25±0.54 | 3.02±0.28 | Thermal Annealing      |
|                                   | 18.4              |        | 1.14 | 3.41±0.85 | 2.85±0.48 | Thermal Annealing      |
| PS- <i>b</i> -PDMS <sup>b</sup>   | 13.6              | 0.0950 | 1.09 | 4.83±0.19 | 4.11±0.23 | Solvent Annealing      |
|                                   | 13.3              |        |      | 2.85±0.12 | 2.54±0.16 | Solvothermal Annealing |
| P4VP- <i>b</i> -PDMS <sup>c</sup> | 17.6              | 0.6650 | 1.25 | 1.88±0.17 | 0.98±0.07 | Solvothermal Annealing |

<sup>a</sup> According to K. S. Lee *et al*, *ACS Applied Materials & Interfaces*, 2017, **9**, 31245-31251. <sup>b</sup> According to J. M. Kim *et al*, *Advanced Functional Materials*, 2015, **25**, 306-315. <sup>c</sup> According to J. M. Kim *et al*, *Chemistry of Materials*, 2016, **28**, 5680-5688. <sup>d</sup> CD of PS-*b*-PMMA was calculated by half of domain size.

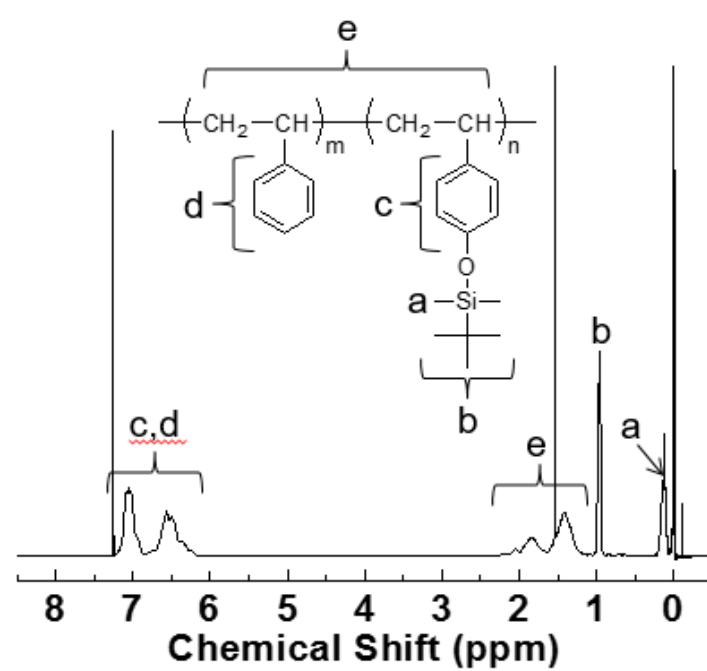

**Figure S1.** Characteristics of  $^1\text{H}$  NMR of PS-*b*-P4BDSS

According to **Leibler's mean-field theory**,

$$I(q) = K[S(q) / W(q) - 2\chi]^{-1}$$

where K is a proportionality constant which is not important in the present work and  $\chi$  is defined in the text.

$$S(q) = \langle S_{x,x}(q) \rangle_v + 2\langle S_{x,y}(q) \rangle_v + \langle S_{y,y}(q) \rangle_v$$

$$W(q) = \langle S_{x,x}(q) \rangle_v^2 + \langle S_{y,y}(q) \rangle_v^2 - 2\langle S_{x,y}(q) \rangle_v^2$$

where,

$$\langle S_{x,x}(q) \rangle_v = r_{c,n} f_x^2 g_x^{(2)}(q)$$

$$\langle S_{x,y}(q) \rangle_v = r_{c,n} f_x f_y g_x^{(1)}(q) g_y^{(1)}(q)$$

$$r_{c,n} = (v_x N_{x,n} + v_y N_{y,n}) / (v_x + v_y)^{1/2}$$

$$g_x^{(1)}(q) = 1/x_{x,n} \{1 - [x_{x,n} (\lambda_x - 1) + 1]^{-\lambda_x - 1}\}$$

$$g_x^{(2)}(q) = 1/x_{x,n}^2 \{-1 + [x_{x,n} (\lambda_x - 1) + 1]^{-\lambda_x - 1}\}$$

$$x_{x,n} = (N_{x,n} b_x^2 / 6) q^2$$

$$\lambda_{x,n} = N_{x,w} / N_{x,n}$$

$v_x$  is molecular volume of X (cm<sup>3</sup>/mol).  $f_x$  is the volume fraction of X.  $N_{x,n}$  and  $N_{x,w}$  is the number-average and weight-average degree of polymerization of X block chain.  $b_x$  is the segment length of X.

**Figure S2.** Calculation of chi in PS-*b*-P4BDSS

|               | <b>w</b>          | <b>f</b>          | <b>N</b>         | <b>b</b>         | <b>v</b>       | <b><math>\lambda</math></b> |
|---------------|-------------------|-------------------|------------------|------------------|----------------|-----------------------------|
|               | (weight fraction) | (volume fraction) | (repeating unit) | (segment length) | (molar volume) | (PDI)                       |
| <b>PS</b>     | 0.600             | 0.634             | 72.0             | 0.57             | 98.6           | 1.03                        |
| <b>P4BDSS</b> | 0.400             | 0.366             | 21.3             | 0.47             | 194            | 1.10                        |

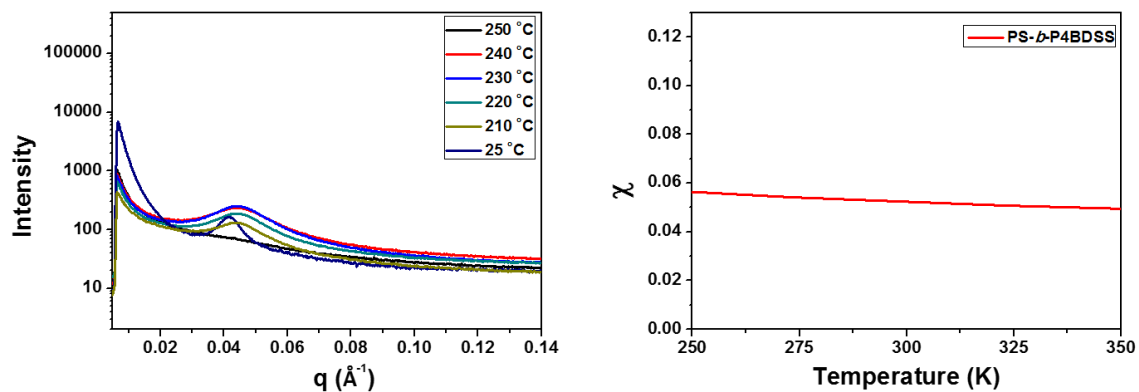

**Figure S3.** Calculation of  $\chi$  in poly PS-*b*-P4BDSS

|             | <b>w</b>          | <b>f</b>          | <b>N</b>         | <b>b</b>         | <b>v</b>       | <b><math>\lambda</math></b> |
|-------------|-------------------|-------------------|------------------|------------------|----------------|-----------------------------|
|             | (weight fraction) | (volume fraction) | (repeating unit) | (segment length) | (molar volume) | (PDI)                       |
| <b>PMMA</b> | 0.500             | 0.468             | 179.78           | 0.488            | 84.84          | 1.54                        |
| <b>PS</b>   | 0.500             | 0.532             | 172.83           | 0.681            | 100.14         | 1.18                        |

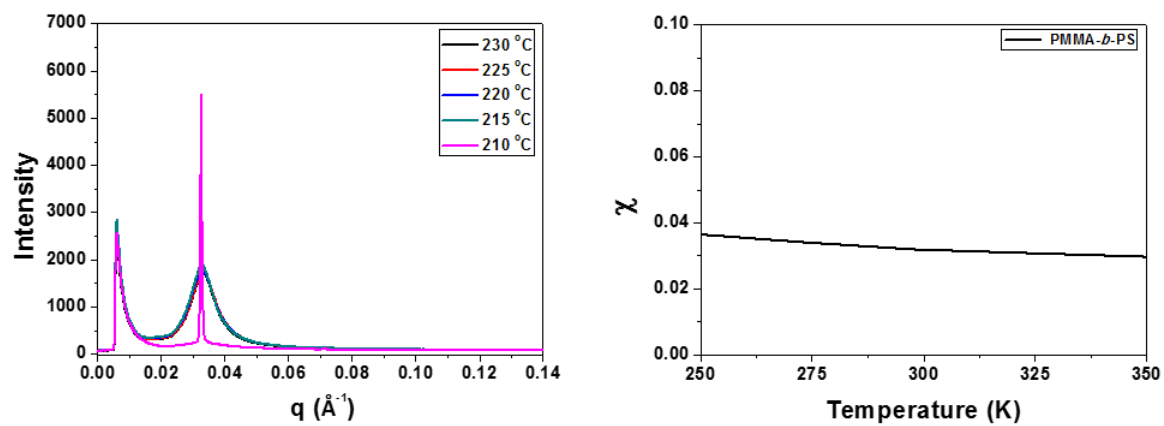

**Figure S4.** Calculation of  $\chi$  in PS-*b*-PMMA (34k)



|             | <b>w</b>          | <b>f</b>          | <b>N</b>         | <b>b</b>         | <b>v</b>       | <b><math>\lambda</math></b> |
|-------------|-------------------|-------------------|------------------|------------------|----------------|-----------------------------|
|             | (weight fraction) | (volume fraction) | (repeating unit) | (segment length) | (molar volume) | (PDI)                       |
| <b>PDMS</b> | 0.487             | 0.319             | 31.02            | 0.712            | 104.14         | 1.13                        |
| <b>PS</b>   | 0.513             | 0.681             | 50.12            | 0.681            | 138.50         | 1.76                        |

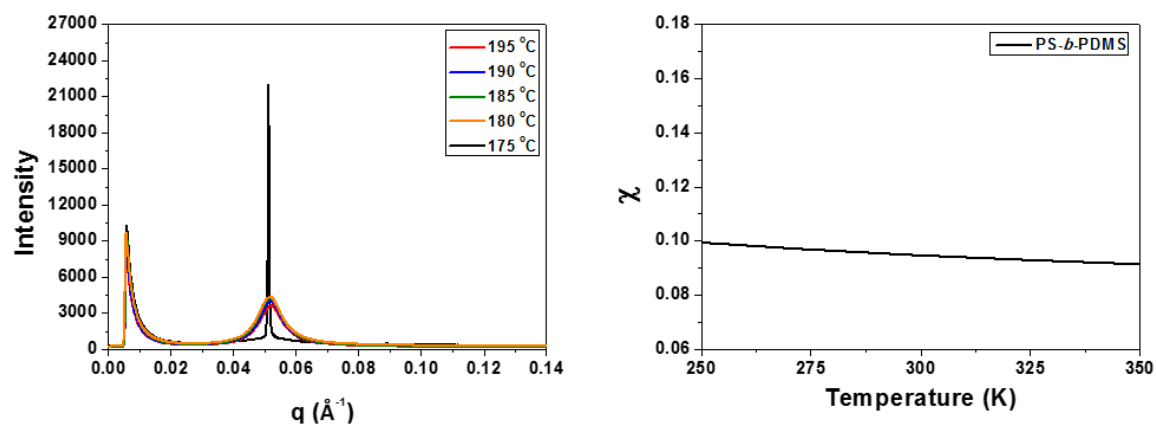

**Figure S5.** Calculation of  $\chi$  in PS-*b*-PDMS

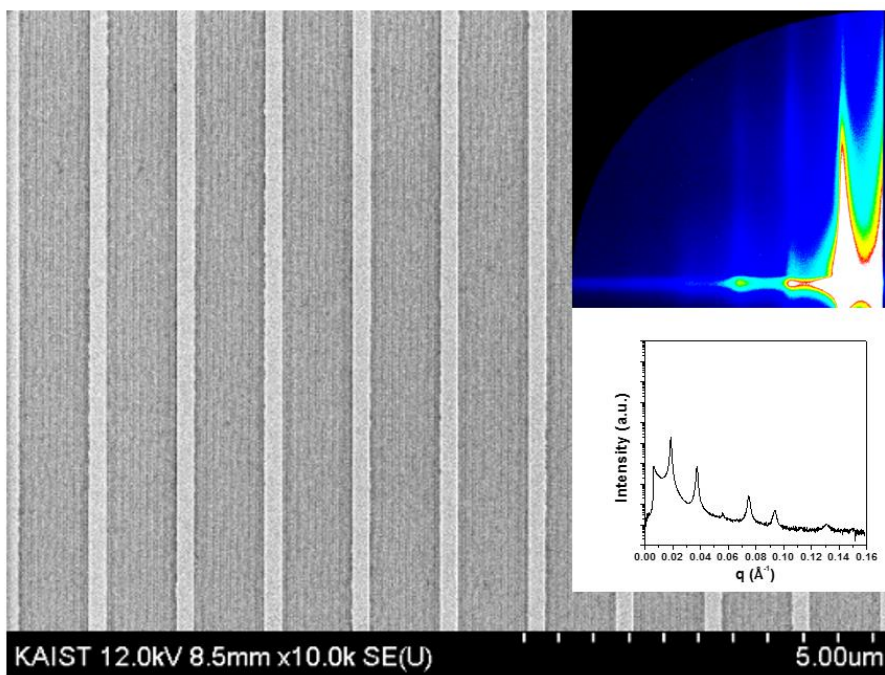

**Figure S6.** SEM and GISAXS measurements of A-54

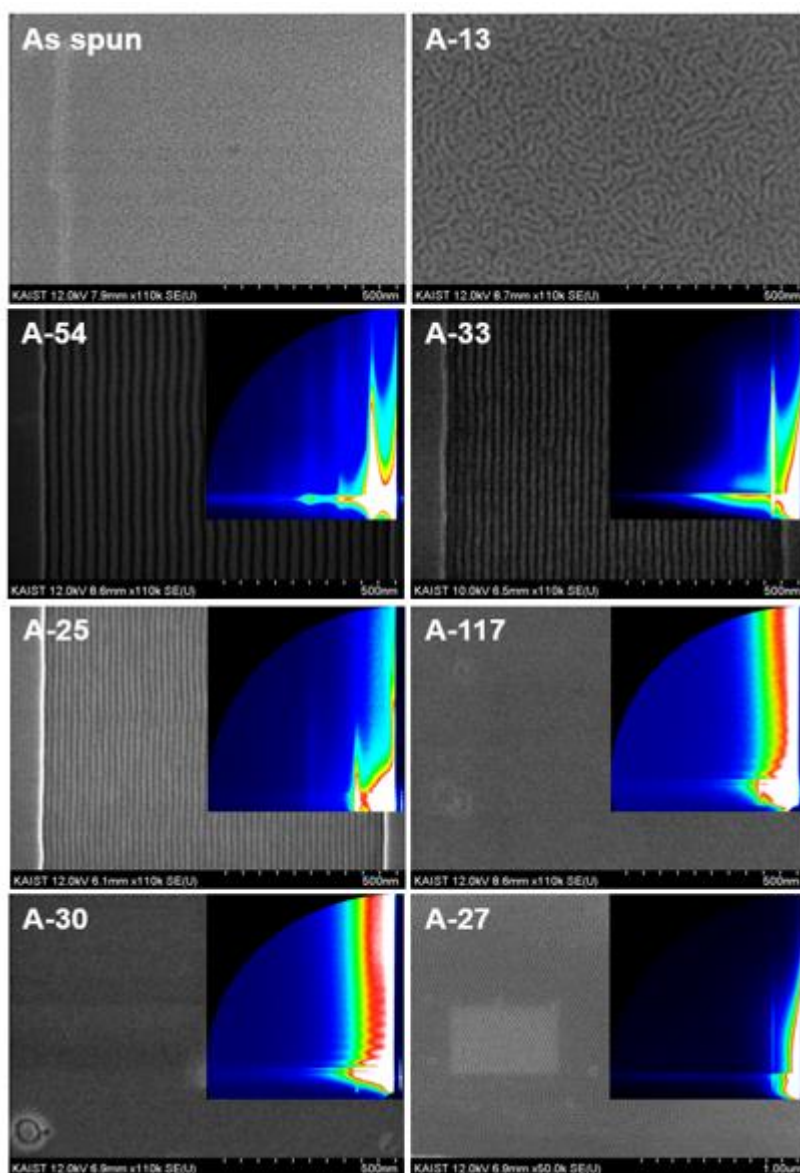

**Figure S7.** Self-assembly of PS-*b*-P4BDSS at 200 °C for 1h.

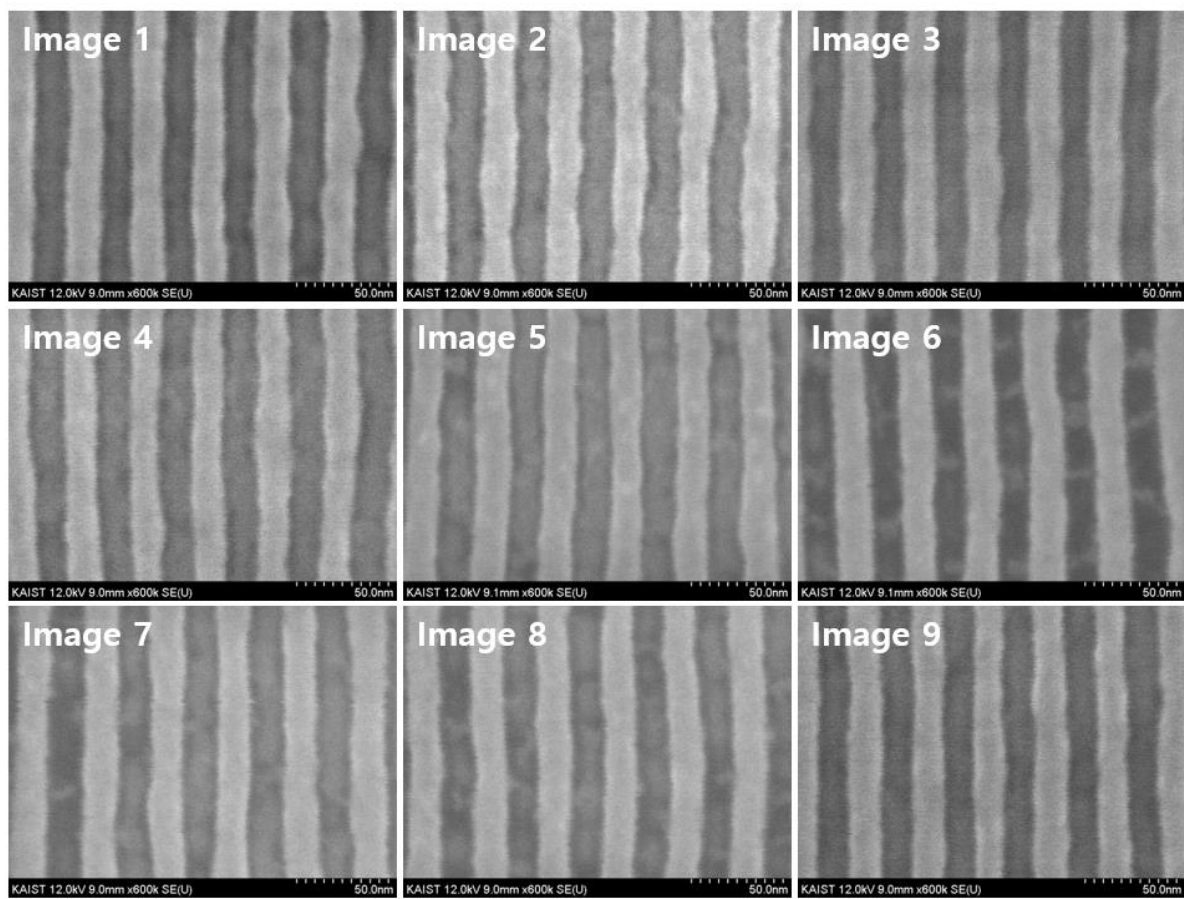

**Figure S8.** Pattern quality analysis of A-54

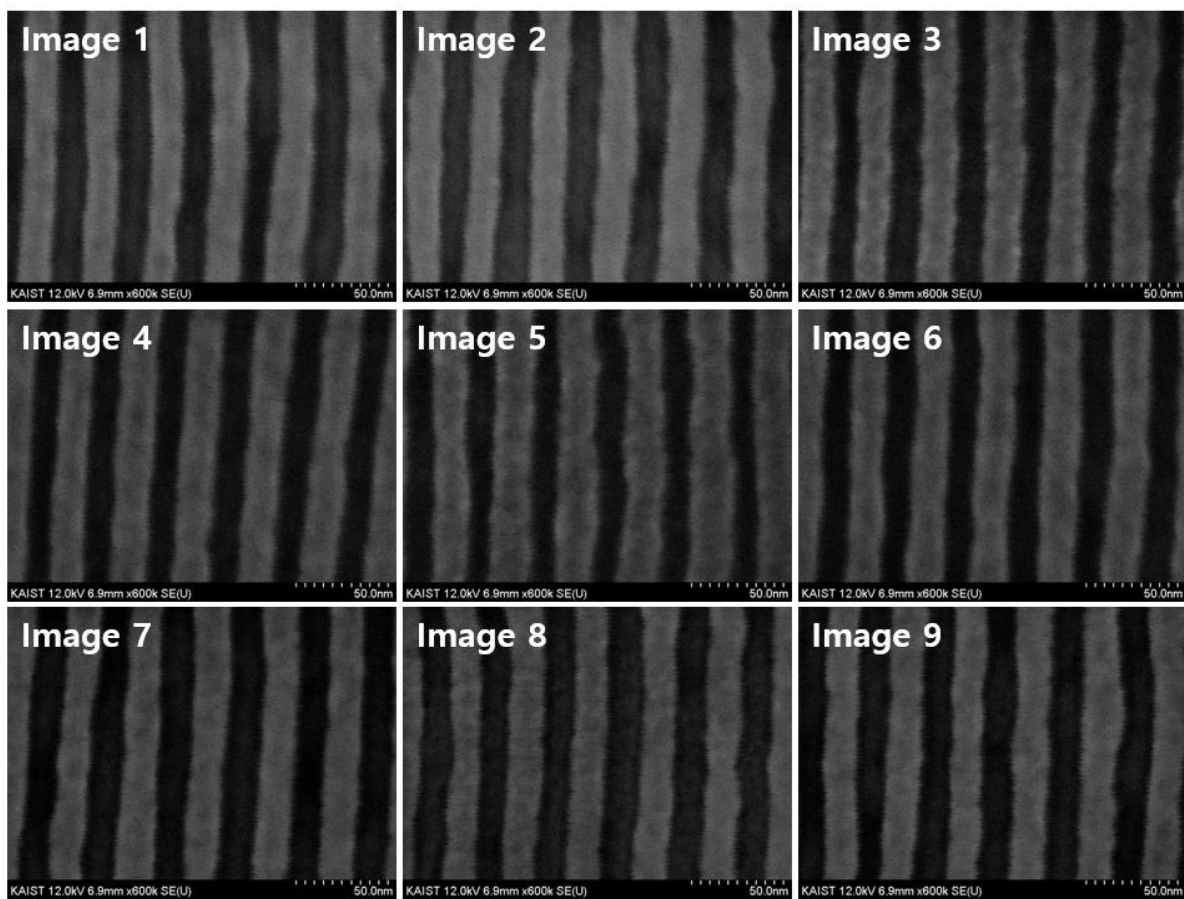

**Figure S9.** Pattern quality analysis of R-55

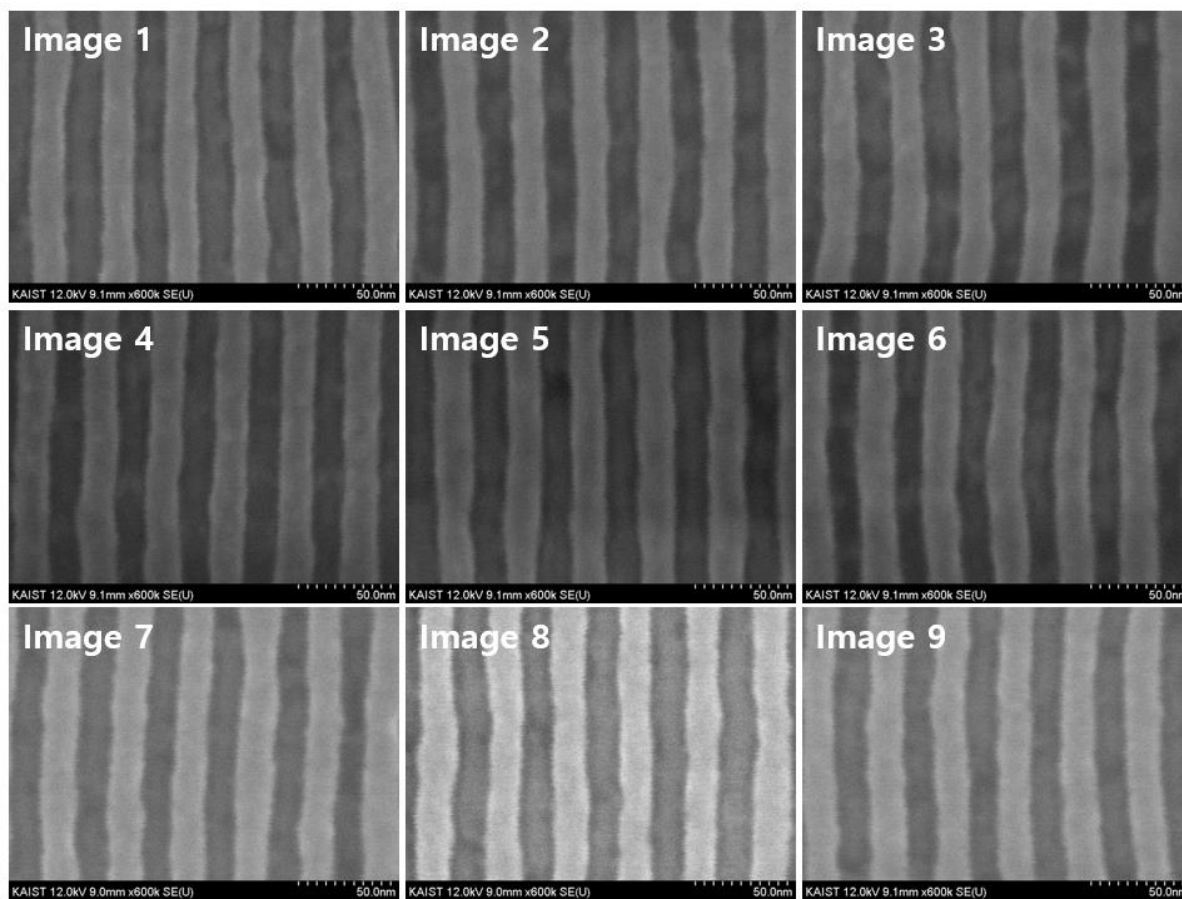

**Figure S10.** Pattern quality analysis of R-54

(a) Left LER analysis

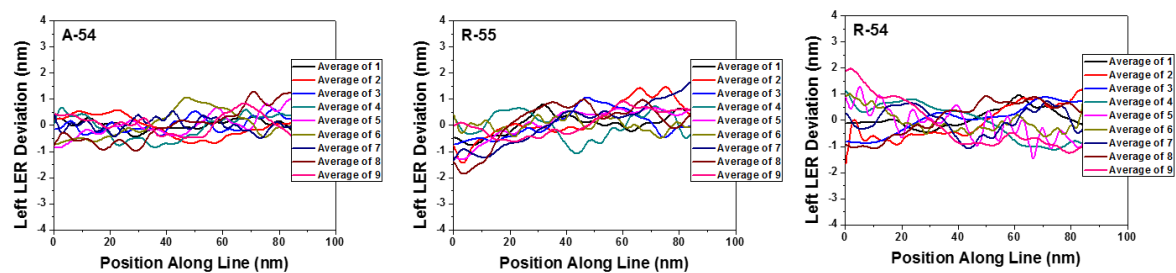

(b) Right LER analysis

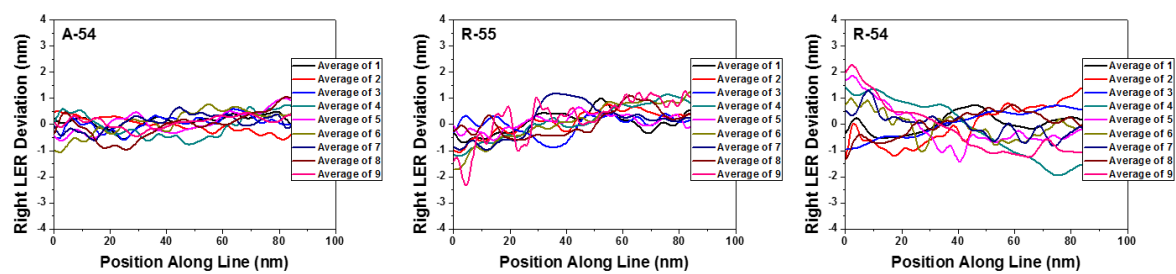

**Figure S11.** LER comparison of PS-*b*-P4BDSS

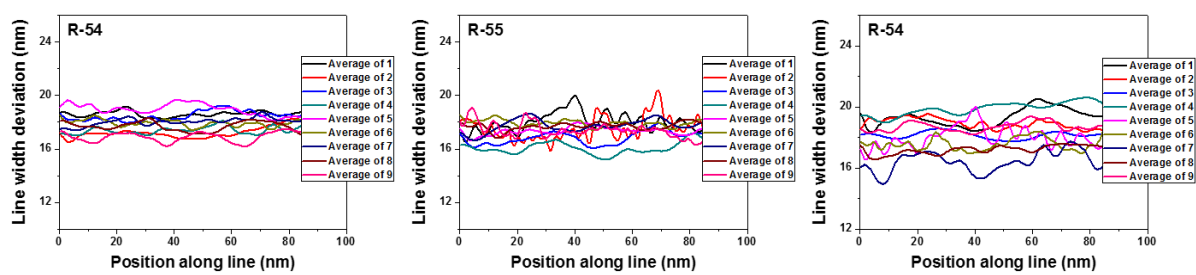

**Figure S12.** LWR comparison of PS-*b*-P4BDSS



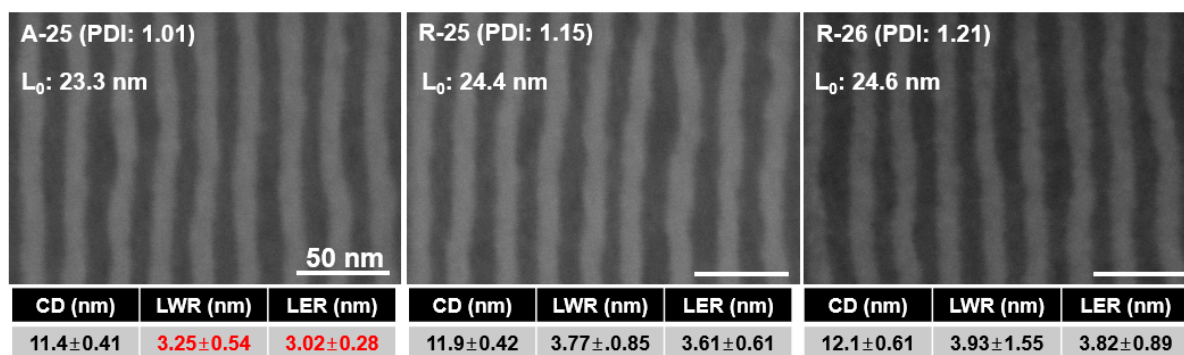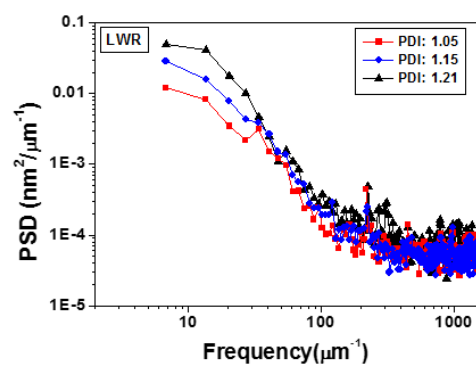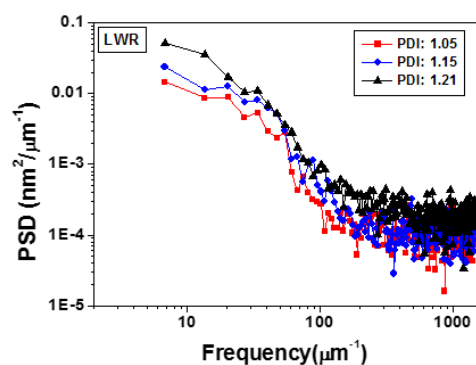

**Figure S13.** Pattern quality comparison of PS-*b*-P4BDSS by changing PDI

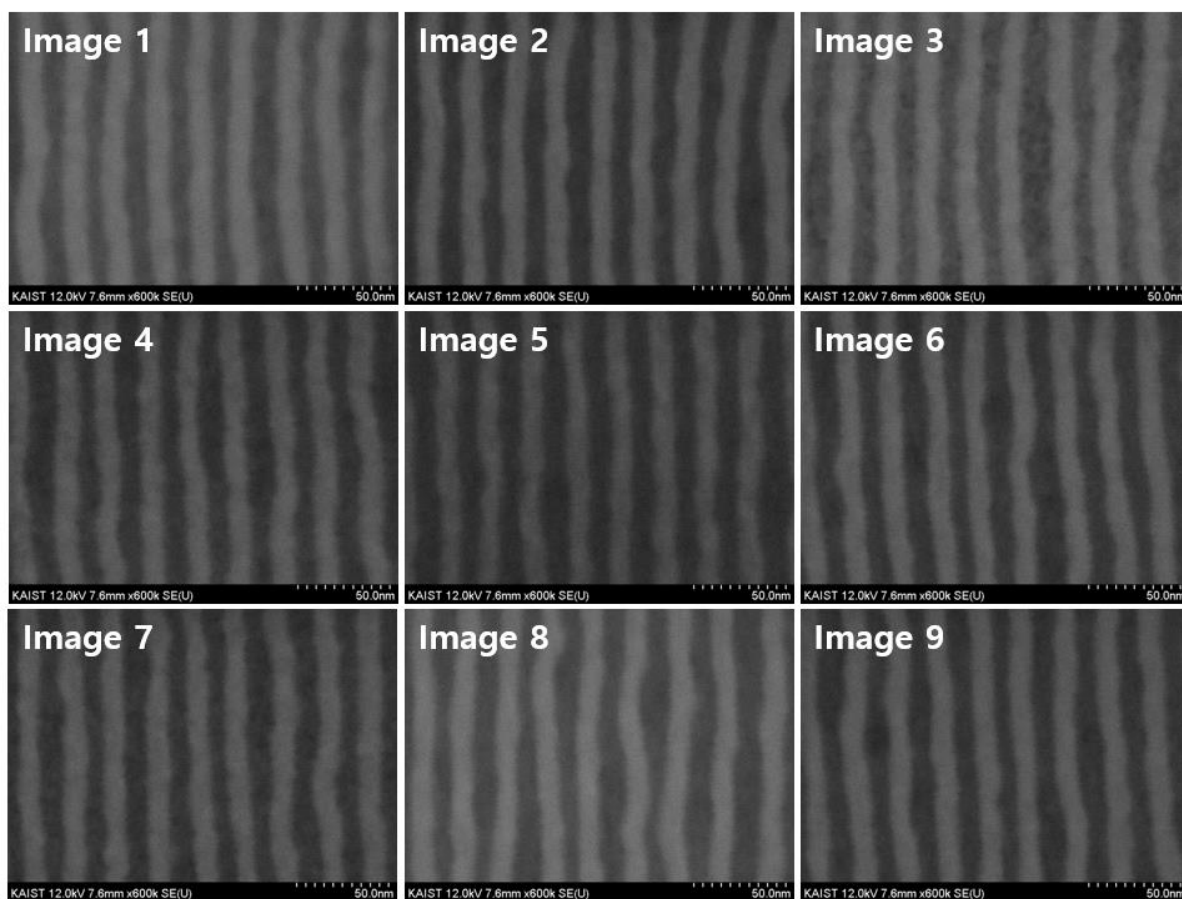

**Figure S14.** Pattern quality analysis of A-25

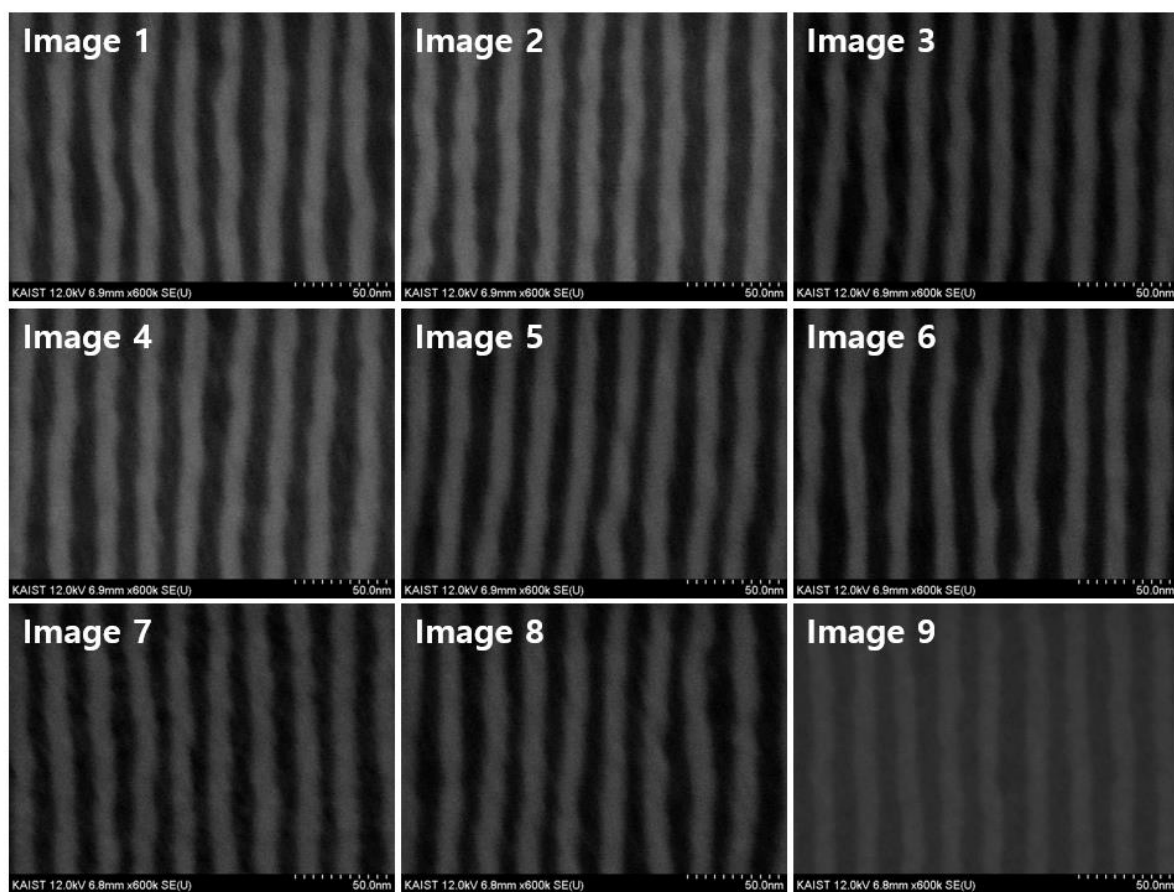

**Figure S15.** Pattern quality analysis of R-25

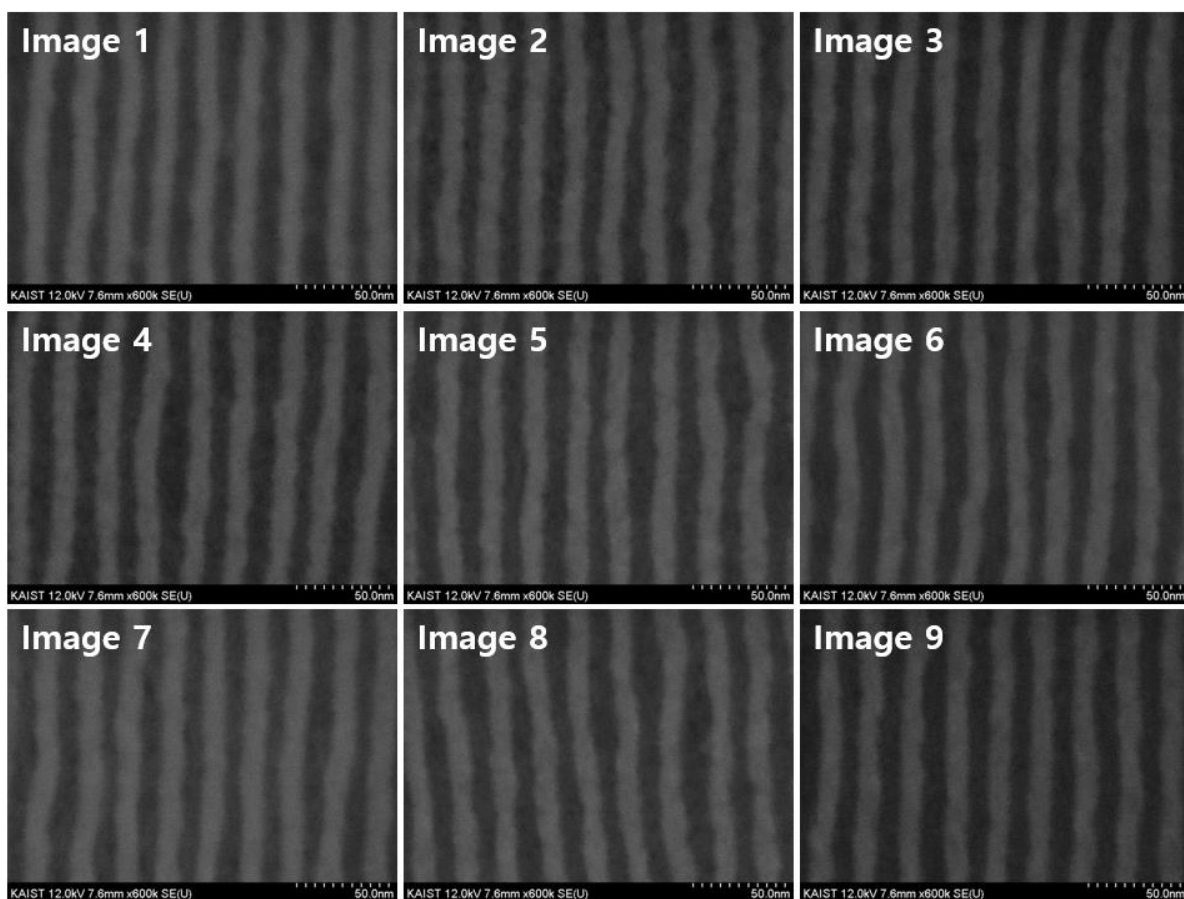

**Figure S16.** Pattern quality analysis of R-26

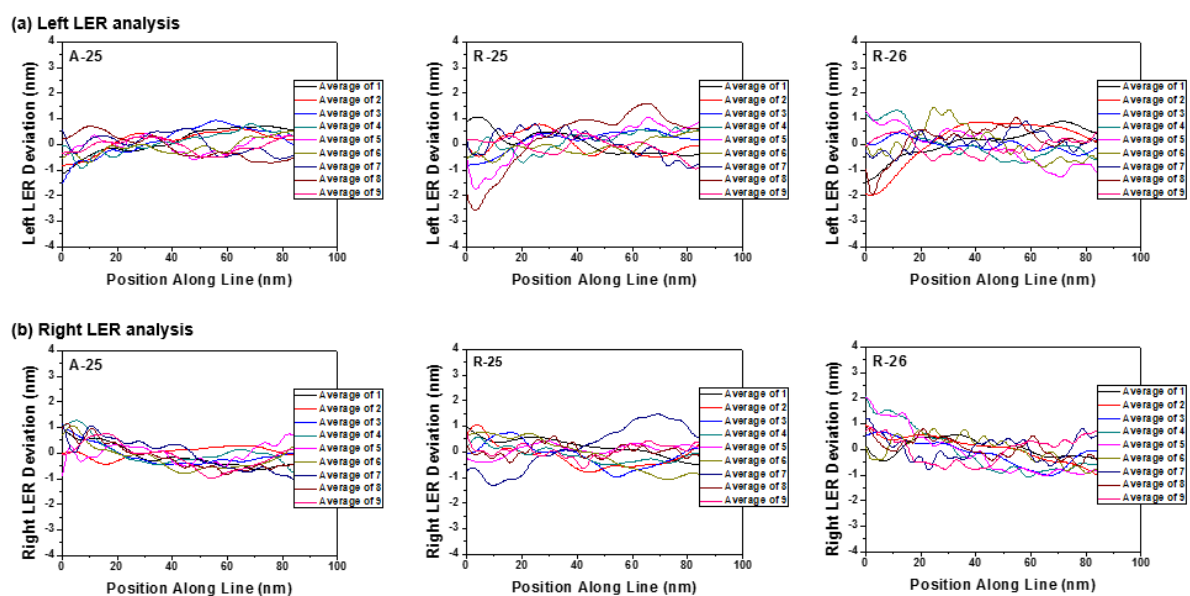

**Figure S17.** LER comparison of PS-*b*-P4BDSS

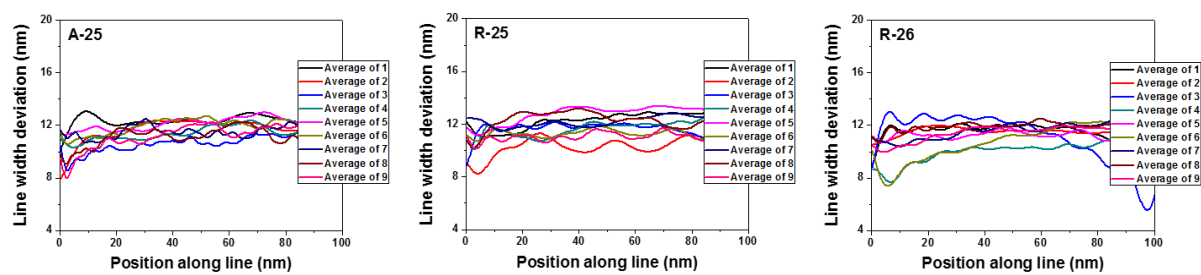

**Figure S18.** LWR comparison of PS-*b*-P4BDSS
